# Supplementary material
Source: PubMed Central journal article supplement (PMC1892917)
Supplement: pnas_0607875104_5.pdf [file pnas_0607875104_5.pdf]

**Table 1. Instrumental methods for uranium analysis in the literature**

| <b>Method</b>                                           | <b>Detection limit</b> | <b>Source</b> |
|---------------------------------------------------------|------------------------|---------------|
| Inductively coupled plasma-atomic emission spectrometry | 8.4 nM                 | Ref. 1        |
| Inductively coupled plasma-mass spectrometry            | 420 pM                 | Ref. 2        |
| Atomic absorption spectrometry                          | 336 nM                 | Ref. 3        |
| Stripping voltammetry                                   | 100 pM                 | Ref. 4        |
| Phosphorimetry                                          | 42 pM                  | Ref. 5        |
| Kinetic phosphorimetry                                  | 4.2 pM                 | Ref. 6        |
| Catalytic DNA sensor                                    | 45 pM                  | This work     |

1. Huff EA, Bowers DL (1990) *Appl Spectrosc* 44:728-729.
2. Boomer DW, Powell MJ (1987) *Anal Chem* 59:2810-2813.
3. Abbasi SA (1989) *Int J Environ Anal Chem* 36:163-172.
4. Mlakar M, Branica M (1989) *Anal Chim Acta* 221:279-287.
5. Kaminski R, Purcell FJ, Russavage E (1981) *Anal Chem* 53:1093-1096.
6. Brina R, Miller AG (1992) *Anal Chem* 64:1413-1418.
